# Supplementary material for: Construction of evaluation index system and empirical analysis of green development level of oyster aquaculture industry
Source: Research Square preprint supplement (doi:10.21203/rs.3.rs-6903110/v1), 2025-06-26
Supplement: Supplementary file 1 [file 116ea5a70e9fc172ec5a6b73.docx]

Table 5

Evaluation result of green development of China's oyster aquaculture industry under the TOPSIS method

| Year | Positive ideal solution distance | Negative ideal solution distance | Relative proximity C |
| --- | --- | --- | --- |
| 2001 | 0.741 | 0.534 | 0.419 |
| 2002 | 0.699 | 0.547 | 0.439 |
| 2003 | 0.774 | 0.386 | 0.333 |
| 2004 | 0.770 | 0.396 | 0.340 |
| 2005 | 0.749 | 0.402 | 0.349 |
| 2006 | 0.740 | 0.443 | 0.375 |
| 2007 | 0.742 | 0.462 | 0.383 |
| 2008 | 0.731 | 0.445 | 0.378 |
| 2009 | 0.725 | 0.433 | 0.374 |
| 2010 | 0.721 | 0.446 | 0.382 |
| 2011 | 0.698 | 0.476 | 0.406 |
| 2012 | 0.621 | 0.530 | 0.460 |
| 2013 | 0.577 | 0.594 | 0.507 |
| 2014 | 0.569 | 0.582 | 0.506 |
| 2015 | 0.540 | 0.625 | 0.536 |
| 2016 | 0.550 | 0.603 | 0.523 |
| 2017 | 0.528 | 0.622 | 0.541 |
| 2018 | 0.486 | 0.672 | 0.580 |
| 2019 | 0.472 | 0.715 | 0.602 |
| 2020 | 0.463 | 0.729 | 0.612 |
| 2021 | 0.502 | 0.749 | 0.599 |
| 2022 | 0.491 | 0.794 | 0.618 |
