# Supplementary material for: Construction of evaluation index system and empirical analysis of green development level of oyster aquaculture industry
Source: Research Square preprint supplement (doi:10.21203/rs.3.rs-6903110/v1), 2025-06-26
Supplement: Supplementary file 2 [file 1798823a20135adbcb5e3206.docx]

**Table** **6**

Linear regression test result of the rank-sum ratio method

|  | Non-standardized coefficient | | |  | Standardized coefficient | T | P | VIF | R² | Adjustment of R² | F |
| --- | --- | --- | --- | --- | --- | --- | --- | --- | --- | --- | --- |
|  | B | | Standard error |  | Beta |
| Constant | -0.175 | | 0.041 |  | - | -4.254 | 0.000*** | - | 0.929 | 0.926 | F=263.086 P=0.000*** |
| Probit | 0.128 | | 0.008 |  | 0.964 | 16.220 | 0.000*** | 1 |
|  | | Implicit variable: RSR | | | | | | | | | |

Note: ***, **, * represent 1%, 5%, and 10% significance levels, respectively.
