# Supplementary material for: Construction of evaluation index system and empirical analysis of green development level of oyster aquaculture industry
Source: Research Square preprint supplement (doi:10.21203/rs.3.rs-6903110/v1), 2025-06-26
Supplement: Supplementary file 3 [file 1e57ea49fcf4dce4b1f5bf6a.docx]

Table 8

Fuzzy joint evaluation result of multiple methods

| Year | Efficacy coefficient method | | TOPSIS method | | Rank-sum ratio method | | Synthesize | |
| --- | --- | --- | --- | --- | --- | --- | --- | --- |
| Score D | Sorting | Relative proximity C | Sorting | RSR value | Sorting | 0.4*D+0.3*C+0.3*RSR | Sorting |
| 2001 | 74.749 | 14 | 0.419 | 13 | 0.397 | 14 | 75.692 | 13 |
| 2002 | 76.217 | 12 | 0.439 | 12 | 0.432 | 12 | 76.941 | 12 |
| 2003 | 71.025 | 22 | 0.333 | 22 | 0.308 | 22 | 72.103 | 22 |
| 2004 | 71.277 | 21 | 0.340 | 21 | 0.315 | 21 | 72.365 | 21 |
| 2005 | 72.014 | 20 | 0.349 | 20 | 0.332 | 20 | 72.976 | 20 |
| 2006 | 72.985 | 19 | 0.375 | 18 | 0.356 | 19 | 73.961 | 19 |
| 2007 | 73.225 | 18 | 0.383 | 15 | 0.361 | 18 | 74.223 | 16 |
| 2008 | 73.266 | 16 | 0.378 | 17 | 0.362 | 16 | 74.189 | 17 |
| 2009 | 73.239 | 17 | 0.374 | 19 | 0.362 | 17 | 74.123 | 18 |
| 2010 | 73.573 | 15 | 0.382 | 16 | 0.369 | 15 | 74.446 | 15 |
| 2011 | 74.781 | 13 | 0.406 | 14 | 0.398 | 13 | 75.566 | 14 |
| 2012 | 77.882 | 11 | 0.460 | 11 | 0.473 | 11 | 78.345 | 11 |
| 2013 | 80.355 | 9 | 0.507 | 9 | 0.532 | 9 | 80.608 | 9 |
| 2014 | 80.277 | 10 | 0.506 | 10 | 0.530 | 10 | 80.542 | 10 |
| 2015 | 81.943 | 7 | 0.536 | 7 | 0.569 | 7 | 82.043 | 7 |
| 2016 | 81.239 | 8 | 0.523 | 8 | 0.552 | 8 | 81.398 | 8 |
| 2017 | 82.160 | 6 | 0.541 | 6 | 0.574 | 6 | 82.249 | 6 |
| 2018 | 84.290 | 5 | 0.580 | 5 | 0.625 | 5 | 84.179 | 5 |
| 2019 | 85.753 | 4 | 0.602 | 3 | 0.660 | 4 | 85.447 | 4 |
| 2020 | 86.347 | 2 | 0.612 | 2 | 0.674 | 2 | 85.973 | 2 |
| 2021 | 86.168 | 3 | 0.599 | 4 | 0.670 | 3 | 85.695 | 3 |
| 2022 | 87.798 | 1 | 0.618 | 1 | 0.709 | 1 | 87.038 | 1 |
