# Supplementary material for: Construction of evaluation index system and empirical analysis of green development level of oyster aquaculture industry
Source: Research Square preprint supplement (doi:10.21203/rs.3.rs-6903110/v1), 2025-06-26
Supplement: Supplementary file 4 [file 1fdaf7b2ecc69581d6c94679.docx]

**Table 1**

Evaluation indicators for green development of oyster aquaculture industry

| No. | Standardized layer | Indicator layer | Screening results | No. | Standardized layer | Indicator layer | Screening results |
| --- | --- | --- | --- | --- | --- | --- | --- |
| 1 | Green economy | Area growth rate | Retention | 14 | Green society | Aquatic technology promoter | R clustering-factor analysis deleted |
| 2 | Production growth rate | 15 | Extension of the level of education of technicians |
| 3 | Value of production as a share of fisheries | 16 | Number of employees in scientific research institutions |
| 4 | Maritime dependence | 17 | Number of law enforcement agencies |
| 5 | Resource productivity | 18 | Expenditure on research and experimental development as a share of GDP |
| 6 | Value of production as a share of mariculture | 19 | Number of fisheries managers |
| 7 | Market share | 20 | Percentage of professional practitioners |
| 8 | Product price index | 21 | R&D investment | Non-measurable |
| 9 | Growth rate of imports | 22 | Technical coverage |
| 10 | Export price growth rate | 23 | Percentage of licensed farmers |
| 11 | Percentage of exports | R clustering-factor analysis deleted | 24 | Fish quality and safety inspection pass rate |
| 12 | Growth rate of output | 25 | Industrial peripheral product types |
| 13 | State-level Aquatic Original Seed Farm | 26 | Educational level of practitioners |
| 14 | Yield per unit area | 27 | Remuneration for work per unit of production |
| 15 | Production as a share of mariculture | 28 | Workload per unit of production |
| 16 | Growth rate of exports | 29 | Healthy working environment |
| 17 | Production as a share of fish products | 30 | Number of industrial and cultural parks |
| 18 | Product quality | 31 | Consumer satisfaction |
| 19 | Number of Processing Industry Enterprises Above Scale | 1 | Green environment | Marine beach resource endowment factor | Retention |
| 20 | Trade Competitive Advantage Index | 2 | Retention rate of marine mudflat resources |
| 21 | Share of imports | 3 | Share of aquaculture area in aquaculture area |
| 22 | Import price growth rate | 4 | Proportion of near-shore marine waters with good water quality of category 1 or 2 |
| 23 | Farming density compliance rate | Non-measurable | 5 | Rate of product loss due to natural disasters |
| 24 | Intermediate consumption per unit of output | 6 | Carbon sink |
| 25 | Percentage of factory farming | 7 | Share of yield loss due to pollution |
| 26 | Number of industrial estates | 8 | Rate of product loss due to disease |
| 27 | Product Processing Capability | 9 | Farmed area as a proportion of marine mudflat area | R clustering-factor analysis deleted |
| 28 | Number of ecological farming demonstration bases | 10 | Share of aquaculture area in mariculture area |
| 29 | Mechanisation level | 11 | Amount of culture waste (oyster shells) generated |
| 30 | Product diversity | 12 | Authorized sea area |
| 31 | Number of green food labels | 13 | Share of yield losses due to natural disasters |
| 32 | Number of geographical indications granted for agricultural products | 14 | Proportion of farming area affected by disease |
| 33 | Number of green fish approvals | 15 | Share of pollution-affected farming area |
| 34 | Production of green products | 16 | Share of farming area affected by natural disasters |
| 1 | Green society | Amount of employment accommodated | Retention | 17 | Share of yield loss due to disease |
| 2 | Net income from fisheries | 18 | Rate of product loss due to contamination |
| 3 | Aquatic Technology Promotion Organization | 19 | Resource retention rate | Non-measurable |
| 4 | Labor productivity | 20 | Maritime resource utilisation |
| 5 | Number of technical training sessions | 21 | Percentage of deep-sea aquaculture area |
| 6 | Number of R&D organizations | 22 | Sedimentation of mariculture waters |
| 7 | Percentage of middle and senior technicians | 23 | Rate of centralised treatment of farm wastewater |
| 8 | Output as a share of GDP | 24 | Accumulation of organic matter |
| 9 | Apparent consumption per capita | 25 | Water Quality Improvement |
| 10 | Economic dependence on productive activities | 26 | Comprehensive utilisation rate of farm waste |
| 11 | Funding for aquatic technology promotion projects |  | 27 | Percentage of products meeting drug residue standards |
| 12 | Number of technical trainers | 28 | Percentage of budgetary expenditure on energy conservation and protection |
| 13 | Financial allocations for scientific and technological activities | 29 | Investment in environmental pollution control |
