# Supplementary material for: Construction of evaluation index system and empirical analysis of green development level of oyster aquaculture industry
Source: Research Square preprint supplement (doi:10.21203/rs.3.rs-6903110/v1), 2025-06-26
Supplement: Supplementary file 5 [file 7b8c644fe9cc0c27a263313c.docx]

**Table 10**

Classification of green development level of oyster aquaculture industry in China

| Year | Probit | RSR fitted value | Level |
| --- | --- | --- | --- |
| 2001 | 4.770 | 0.437 | 2 |
| 2002 | 5.000 | 0.467 | 2 |
| 2003 | 3.309 | 0.250 | 1 |
| 2004 | 3.665 | 0.295 | 2 |
| 2005 | 3.903 | 0.326 | 2 |
| 2006 | 4.092 | 0.350 | 2 |
| 2007 | 4.252 | 0.371 | 2 |
| 2008 | 4.527 | 0.406 | 2 |
| 2009 | 4.395 | 0.389 | 2 |
| 2010 | 4.651 | 0.422 | 2 |
| 2011 | 4.886 | 0.452 | 2 |
| 2012 | 5.114 | 0.481 | 3 |
| 2013 | 5.349 | 0.512 | 3 |
| 2014 | 5.230 | 0.496 | 3 |
| 2015 | 5.605 | 0.544 | 3 |
| 2016 | 5.473 | 0.527 | 3 |
| 2017 | 5.748 | 0.563 | 3 |
| 2018 | 5.908 | 0.583 | 3 |
| 2019 | 6.097 | 0.607 | 3 |
| 2020 | 6.691 | 0.684 | 4 |
| 2021 | 6.335 | 0.638 | 3 |
| 2022 | 7.278 | 0.759 | 4 |
