# Supplementary material for: Construction of evaluation index system and empirical analysis of green development level of oyster aquaculture industry
Source: Research Square preprint supplement (doi:10.21203/rs.3.rs-6903110/v1), 2025-06-26
Supplement: Supplementary file 6 [file 9e8de5872bbae4f0479106fd.docx]

Table 2

Result of R-clustering factor analysis for indicator screening

| No. | Standardized layer | Indicator layer | Clustering category | K-w test sig | Factor loading Zij | Retention or non-retention |
| --- | --- | --- | --- | --- | --- | --- |
| 1 | Green economy | Area growth rate | 1 | 0.822 | 0.998 | Yes |
| 2 | Percentage of exports | 1 | 0.997 | No |
| 3 | Production growth rate | 2 | 0.943 | 0.996 | No |
| 4 | Growth rate of output | 2 | 0.998 | Yes |
| 5 | Value of production as a share of fisheries | 3 | 0.822 | 0.998 | Yes |
| 6 | State-level Aquatic Original Seed Farm | 3 | 0.994 | No |
| 7 | Yield per unit area | 4 | 0.987 | 0.997 | No |
| 8 | Maritime dependence | 4 | 0.999 | Yes |
| 9 | Value of production as a share of mariculture | 4 | 0.996 | No |
| 10 | Growth rate of exports | 4 | 0.975 | No |
| 11 | Resource productivity | 5 | — | — | Yes |
| 12 | Production as a share of fish products | 6 | 0.987 | 0.999 | No |
| 13 | Production as a share of mariculture | 6 | 1.000 | Yes |
| 14 | Product quality | 6 | 0.996 | No |
| 15 | Number of Processing Industry Enterprises Above Scale | 6 | 0.994 | No |
| 16 | Market share | 7 | 0.822 | 1.000 | Yes |
| 17 | Trade competitive advantage index | 7 | 0.999 | No |
| 18 | Product price index | 8 | — | — | Yes |
| 19 | Growth rate of imports | 9 | — | — | Yes |
| 20 | Share of imports | 10 | 0.822 | 0.983 | No |
| 21 | Import price growth rate | 10 | 0.990 | No |
| 22 | Export price growth rate | 10 | 0.999 | Yes |
| 23 | Green society | Aquatic technology promotion organization | 1 | 0.987 | 0.988 | No |
| 24 | Number of technical trainers | 1 | 0.563 | No |
| 25 | Financial allocations for scientific and technological activities | 1 | 0.983 | No |
| 26 | Amount of employment accommodated | 1 | 0.989 | Yes |
| 27 | Aquatic technology promoter | 2 | 0.822 | 0.997 | No |
| 28 | Net income from fisheries | 2 | 0.999 | Yes |
| 29 | Funding for aquatic technology promotion projects | 3 | — | — | Yes |
| 30 | Extension of the level of education of technicians | 4 | 0.987 | 0.997 | No |
| 31 | Number of employees in scientific research institutions | 4 | 0.996 | No |
| 32 | Number of law enforcement agencies | 4 | 0.997 | No |
| 33 | Labor productivity | 4 | 0.998 | Yes |
| 34 | Number of technical training sessions | 5 | — | — | Yes |
| 35 | Number of R&D organizations | 6 | 0.822 | 1.000 | Yes |
| 36 | Expenditure on research and experimental development as a share of GDP | 6 | 0.997 | No |
| 37 | Number of fisheries managers | 7 | 0.822 | 0.998 | No |
| 38 | Percentage of middle and senior technicians | 7 | 1.000 | Yes |
| 39 | Output as a share of GDP | 8 | — | — | Yes |
| 40 | Percentage of professional practitioners | 9 | 0.822 | 0.999 | No |
| 41 | Apparent consumption per capita | 9 | 1.000 | Yes |
| 42 | Economic dependence on productive activities | 10 | — | — | Yes |
| 43 | Green environment | Marine beach resource endowment factor | 1 | — | — | Yes |
| 44 | Retention rate of marine mudflat resources | 2 | 0.989 | 0.999 | Yes |
| 45 | Farmed area as a proportion of marine mudflat area | 2 | 0.996 | No |
| 46 | Share of aquaculture area in aquaculture area | 3 | 0.987 | 1.000 | Yes |
| 47 | Share of aquaculture area in mariculture area | 3 | 0.999 | No |
| 48 | Proportion of near-shore marine waters with good water quality of category 1 or 2 | 4 | 0.822 | 1.000 | Yes |
| 49 | Amount of culture waste (oyster shells) generated | 4 | 0.997 | No |
| 50 | Authorized sea area | 5 | 0.953 | 0.994 | No |
| 51 | Rate of product loss due to natural disasters | 5 | 0.998 | Yes |
| 52 | Share of yield losses due to natural disasters | 5 | 0.999 | No |
| 53 | Carbon sink | 6 | 0.953 | 1.000 | Yes |
| 54 | Proportion of farming area affected by disease | 6 | 0.998 | No |
| 55 | Share of pollution-affected farming area | 6 | 0.999 | No |
| 56 | Share of farming area affected by natural disasters | 7 | 0.953 | 0.996 | No |
| 57 | Rate of product loss due to contamination | 7 | 0.998 | No |
| 58 | Share of yield loss due to pollution | 7 | 0.999 | Yes |
| 59 | Rate of product loss due to disease | 8 | 0.822 | 1.000 | Yes |
| 60 | Share of yield loss due to disease | 8 | 0.997 | No |
