# Supplementary material for: Construction of evaluation index system and empirical analysis of green development level of oyster aquaculture industry
Source: Research Square preprint supplement (doi:10.21203/rs.3.rs-6903110/v1), 2025-06-26
Supplement: Supplementary file 7 [file 9e9f48948f1e4615aab22433.docx]

Table 9

Classification table for green development evaluation of oyster aquaculture in China

| Grade | Percentile threshold | Probit | Rsr threshold (fitted value) | Aggregate score | Rating level |
| --- | --- | --- | --- | --- | --- |
| 1 | <6.681 | <3.500 | <0.274 | <70.000 | Low level |
| 2 | 6.681 ~ | 3.500~ | 0.274 ~ | 70.000~ | Low to medium level |
| 3 | 50.000 ~ | 5.000 ~ | 0.467 ~ | 77.500~ | Medium-high level |
| 4 | 93.319 ~ | 6.500 ~ | 0.659 ~ | 85.000~ | High level |
