# Supplementary material for: Construction of evaluation index system and empirical analysis of green development level of oyster aquaculture industry
Source: Research Square preprint supplement (doi:10.21203/rs.3.rs-6903110/v1), 2025-06-26
Supplement: Supplementary file 8 [file dda4c633a53808a614193ced.docx]

Table 4

Descriptive statistics for evaluation indicators

| Indicator | Min （Xij） | Max （Xij） | Mean | Standard Deviation (SD) | Coefficient of Variation（CV） |
| --- | --- | --- | --- | --- | --- |
| X10 | 0.00% | 36.09% | 12.81% | 0.09 | 36.53% |
| X11 | 0.00% | 17.33% | 9.10% | 0.06 | 73.65% |
| X12 | 2.68% | 6.76% | 3.40% | 0.00 | 6.26% |
| X13 | 2.58 | 3.79 | 3.06 | 0.40 | 11.37% |
| X14 | 0.13 | 0.27 | 0.18 | 0.03 | 13.97% |
| X15 | 12.31% | 17.89% | 14.18% | 0.01 | 4.44% |
| X16 | 79.22% | 87.18% | 82.91% | 0.02 | 2.72% |
| X17 | 62.67 | 112.31 | 100.99 | 5.40 | 5.44% |
| X18 | 0.00% | 360.69% | 91.94% | 0.37 | 87.54% |
| X19 | 43.47% | 246.28% | 117.64% | 0.43 | 23.65% |
| X20 | 148089.14 | 182808.56 | 167013.89 | 3169.78 | 1.77% |
| X21 | 4987.00 | 17093.16 | 10356.23 | 1167.47 | 7.37% |
| X22 | 0.12 | 1.16 | 0.37 | 0.22 | 23.27% |
| X23 | 71612.10 | 245664.26 | 147980.13 | 10465.65 | 4.48% |
| X24 | 1104.03 | 2811.53 | 1912.95 | 18.65 | 1.66% |
| X25 | 831.60 | 1102.01 | 972.54 | 8.97 | 0.95% |
| X26 | 23.97% | 49.50% | 40.77% | 0.02 | 3.85% |
| X27 | 0.04% | 0.17% | 0.06% | 0.00 | 0.00% |
| X28 | 2.40 | 4.39 | 3.03 | 0.28 | 6.68% |
| X29 | 55.10% | 107.65% | 68.87% | 0.09 | 13.85% |
| X30 | 1.81 | 2.07 | 1.94 | 0.00 | 0.00% |
| X31 | 0.00% | 64.30% | 24.93% | 0.02 | 13.95% |
| X32 | 1.53% | 12.74% | 4.11% | 0.01 | 17.23% |
| X33 | 41.40% | 81.90% | 66.52% | 0.02 | 3.05% |
| X34 | 23.01 | 49.10 | 32.23 | 0.28 | 80.53% |
| X35 | 0.02% | 0.60% | 0.30% | 0.00 | 79.54% |
| X36 | 0.03% | 15.19% | 2.58% | 0.00 | 74.24% |
| X37 | 4.20% | 32.81% | 15.06% | 0.01 | 18.59% |
