# Supplementary material for: Construction of evaluation index system and empirical analysis of green development level of oyster aquaculture industry
Source: Research Square preprint supplement (doi:10.21203/rs.3.rs-6903110/v1), 2025-06-26
Supplement: Supplementary file 9 [file f8dc7ff8c909223b02b18bca.docx]

Table 3

Evaluation index system for green development of oyster aquaculture industry in China

| Target level | Standardized layer | Indicator layer | Formula | Meaning | Direction | Random forest calculations | CRITIC calculations | Average weight |
| --- | --- | --- | --- | --- | --- | --- | --- | --- |
| Evaluation of green development level of oyster aquaculture in China | Green economy | Area growth rate X10 | (current period - previous period)/previous period | Reflecting the state of factor inputs in the maritime domain | - | 0.006 | 0.032 | 0.019 |
| Growth rate of output X11 | (current period - previous period)/previous period | Reflecting changes in industry economic performance | + | 0.002 | 0.039 | 0.020 |
| Value of production as a share of fisheries X12 | Oyster farming output/fisheries output | Reflecting the place of oyster production in the fishery | + | 0.023 | 0.041 | 0.032 |
| Maritime dependence X13 | Oyster farming area/farming production | Measurement of resource elements consumed per unit of output | - | 0.014 | 0.044 | 0.029 |
| Resource productivity X14 | Value of oyster farming output* coefficient b/area farmed | Measuring input-output benefits of sea area elements | + | 0.059 | 0.033 | 0.046 |
| Production as a share of mariculture X15 | Oyster farming production/mariculture product production | Reflecting the position of oyster production in the mariculture industry | + | 0.012 | 0.028 | 0.020 |
| Market share X16 | National oyster production/global oyster production | Reflecting the market position of the oyster farming industry | + | 0.083 | 0.032 | 0.058 |
| Product price index X17 | Value at current year's price/value at last year's price | Measuring product quality through price fluctuations | + | 0.005 | 0.027 | 0.016 |
| Growth rate of imports X18 | (current period - previous period)/previous period | Reflects the extent to which the supply of oyster products is dependent on international trade | - | 0.003 | 0.031 | 0.017 |
| Export price growth rate X19 | (current period - previous period)/previous period | Reflecting the international trade competitiveness of regional oyster products | + | 0.003 | 0.032 | 0.017 |
| Green society | Amount of employment accommodated X20 | Number of persons over 16 years of age engaged in oyster farming-related activities who receive remuneration for their labor or business income | Measuring the contribution of industrial development to employment, reflecting industrial dynamism | + | 0.026 | 0.032 | 0.029 |
| Net income from fisheries X21 | Net income from fisheries* coefficient a* coefficient b | Reflects income levels of oyster producers | + | 0.102 | 0.034 | 0.068 |
| Funding for aquatic technology promotion projects X22 | Provision for aquatic technology promotion projects* factor a* factor b | Measuring the intensity of research funding | + | 0.101 | 0.028 | 0.065 |
| Labor productivity X23 | Value of oyster farming/number of people employed in oyster farming | Measuring input-output benefits of labor factors | + | 0.039 | 0.032 | 0.035 |
| Number of technical training sessions X24 | Number of technical training periods* factor a | Reflecting training efforts in farming techniques and management practices | + | 0.026 | 0.061 | 0.044 |
| Number of r&d organizations X25 | Number of r&d institutions* coefficient a | Reflecting the capacity and potential for technological innovation in industry | + | 0.004 | 0.035 | 0.020 |
| Percentage of middle and senior technicians X26 | Percentage of extension technicians with senior and middle-level titles* factor a | Reflecting the structure of the aquatic extension workforce | + | 0.030 | 0.033 | 0.032 |
| Output as a share of GDP X27 | Oyster farming output/GDP | Reflects industry's contribution to GDP | + | 0.061 | 0.043 | 0.052 |
| Apparent consumption per capita X28 | (oyster production + imports - exports)/national population | Measuring product demand in the domestic market and reflecting the potential for industrial development | + | 0.084 | 0.030 | 0.057 |
| Economic dependence on productive activities X29 | Net income from fisheries/disposable income of fishermen | Measures the importance of production to fishermen and reflects the degree of specialization in oyster production | + | 0.004 | 0.025 | 0.014 |
| Green environment | Marine beach resource endowment factor X30 | (total marine mudflat area of six provinces/national marine mudflat area)/(total GDP of six provinces/national GDP) | Reflecting the relative abundance of marine mudflat resources | + | 0.057 | 0.035 | 0.046 |
| Retention rate of marine mudflat resources X31 | (marine beach area - mariculture area)/marine beach area | Measurement of the balance of marine beach resources, reflecting the capacity of the industry to expand | + | 0.040 | 0.058 | 0.049 |
| Share of aquaculture area in aquaculture area X32 | Oyster farming area/aquaculture area | Measuring the share of marine resources occupied by industry | - | 0.024 | 0.047 | 0.036 |
| Proportion of near-shore marine waters with good water quality of category 1 or 2 X33 | Percentage of area with water quality categories i and ii | Reflecting oyster aquaculture interactions on water quality in nearshore waters | + | 0.020 | 0.030 | 0.025 |
| Carbon sink X34 | Oyster farming production * 63.8% * 11.5% + oyster farming production * 1.3% * 44.9% | Measuring the carbon sink capacity of oyster farming | + | 0.067 | 0.047 | 0.057 |
| Rate of product loss due to natural disasters X35 | Loss of product due to natural disasters* factor a / value of oyster farming production | Reflecting the impact of natural disasters on industry | - | 0.017 | 0.036 | 0.026 |
| Share of yield loss due to pollution X36 | Loss of yield due to pollution* factor a/oyster farming production | Reflecting the impact of watershed pollution on industry | - | 0.021 | 0.024 | 0.022 |
| Rate of product loss due to disease X37 | Loss of product due to disease* factor a/oyster farming output value | Reflecting the impact of species diseases on the industry | - | 0.067 | 0.031 | 0.049 |
