# Supplementary material for: Construction of evaluation index system and empirical analysis of green development level of oyster aquaculture industry
Source: Research Square preprint supplement (doi:10.21203/rs.3.rs-6903110/v1), 2025-06-26
Supplement: Supplementary file 10 [file fe998f8fd2af142d8ade2474.docx]

Table 7

Evaluation result of green development of China’s oyster aquaculture industry under the rank-sum ratio method

| Year | Cumulative frequency ∑f | Evaluation rank | Evaluation rank /n*100% | RSR |
| --- | --- | --- | --- | --- |
| 2001 | 9 | 9 | 40.909 | 0.397 |
| 2002 | 11 | 11 | 50.000 | 0.432 |
| 2003 | 1 | 1 | 4.545 | 0.308 |
| 2004 | 2 | 2 | 9.091 | 0.315 |
| 2005 | 3 | 3 | 13.636 | 0.332 |
| 2006 | 4 | 4 | 18.182 | 0.356 |
| 2007 | 5 | 5 | 22.727 | 0.361 |
| 2008 | 7 | 7 | 31.818 | 0.362 |
| 2009 | 6 | 6 | 27.273 | 0.362 |
| 2010 | 8 | 8 | 36.364 | 0.369 |
| 2011 | 10 | 10 | 45.455 | 0.398 |
| 2012 | 12 | 12 | 54.545 | 0.473 |
| 2013 | 14 | 14 | 63.636 | 0.532 |
| 2014 | 13 | 13 | 59.091 | 0.530 |
| 2015 | 16 | 16 | 72.727 | 0.569 |
| 2016 | 15 | 15 | 68.182 | 0.552 |
| 2017 | 17 | 17 | 77.273 | 0.574 |
| 2018 | 18 | 18 | 81.818 | 0.625 |
| 2019 | 19 | 19 | 86.364 | 0.660 |
| 2020 | 21 | 21 | 95.455 | 0.674 |
| 2021 | 20 | 20 | 90.909 | 0.670 |
| 2022 | 22 | 22 | 98.864 | 0.709 |
